1 **Title**

2 The functional repertoire encoded within the native microbiome of the model nematode  
3 *Caenorhabditis elegans*

4 **Running title**

5 *C. elegans* microbiome functions

6 **Authors**

7 Johannes Zimmermann<sup>1\*</sup>, Nancy Obeng<sup>2\*</sup>, Wentao Yang<sup>2</sup>, Barbara Pees<sup>3</sup>, Carola  
8 Petersen<sup>2,3</sup>, Silvio Waschina<sup>1</sup>, Kohar Annie Kissoyan<sup>2</sup>, Jack Aidley<sup>2</sup>, Marc P. Hoepfner<sup>4</sup>,  
9 Boyke Bunk<sup>5</sup>, Cathrin Spröer<sup>5</sup>, Matthias Leippe<sup>3</sup>, Katja Dierking<sup>2</sup>, Christoph Kaleta<sup>1#</sup>,  
10 Hinrich Schulenburg<sup>2,6#</sup>

11 **Affiliations**

12 1 Research Group Medical Systems Biology, Institute of Experimental Medicine,  
13 Christian-Albrechts University, Kiel, Germany

14 2 Research Group of Evolutionary Ecology and Genetics, Zoological Institute, Christian-  
15 Albrechts University, Kiel, Germany

16 3 Research Group of Comparative Immunobiology, Zoological Institute, Christian-  
17 Albrechts University, Kiel, Germany

18 4 Institute of Clinical Molecular Biology, Christian-Albrechts University, Kiel, Germany

19 5 Leibniz Institute DSMZ-German Collection of Microorganisms and Cell Cultures,  
20 Braunschweig, Germany

21 6 Max-Planck Institute for Evolutionary Biology, Ploen, Germany

22 \* These authors contributed equally to this work: Shared first authorship

23 # These authors contributed equally to this work: Shared senior authorship

## 24 **Correspondence**

25 Christoph Kaleta, Research Group Medical Systems Biology, Institute of Experimental  
26 Medicine, Christian-Albrechts University, Michaelisstraße 5, 24105 Kiel, Germany; Tel:  
27 +49-431-50030340; Fax: +49-431-50030344; Email: [c.kaleta@iem.uni-kiel.de](mailto:c.kaleta@iem.uni-kiel.de)

28 Hinrich Schulenburg, Research Group of Evolutionary Ecology and Genetics, Zoological  
29 Institute, Christian-Albrechts University, Am Botanischen Garten 9, 24118 Kiel,  
30 Germany; Tel.: +49-431-8804141; Fax: +49-431-8802403; Email:  
31 [hschulenburg@zoologie.uni-kiel.de](mailto:hschulenburg@zoologie.uni-kiel.de)

## 32 **Conflict of interest**

33 All authors declare no competing financial interests in relation to the work described.

## 34 **Keywords**

35 Microbiome, Microbiota, *Caenorhabditis elegans*, *Ochrobactrum*, *Pseudomonas*,  
36 Metabolic networks

37 Financial support: German Science Foundation Collaborative Research Center CRC  
38 1182 on Origin and Function of Metaorganisms, projects A1 (KD, ML, HS), A4 (HS), and  
39 INF (MPH, CK). Excellence Cluster Precision Medicine in Chronic Inflammation (PMI;  
40 CK, HS); the Competence Center for Genome Analysis Kiel (CCGA Kiel; HS); the Max-  
41 Planck Society (Fellowship to HS); and the International Max-Planck Research School  
42 for Evolutionary Biology (NO).

43 **Abstract**

44

45 The microbiome is generally assumed to have a substantial influence on the biology of  
46 multicellular organisms. The exact functional contributions of the microbes are often  
47 unclear and cannot be inferred easily from 16S rRNA genotyping, which is commonly  
48 used for taxonomic characterization of the bacterial associates. In order to bridge this  
49 knowledge gap, we here analyzed the metabolic competences of the native microbiome  
50 of the model nematode *Caenorhabditis elegans*. We integrated whole genome  
51 sequences of 77 bacterial microbiome members with metabolic modelling and  
52 experimental characterization of bacterial physiology. We found that, as a community,  
53 the microbiome can synthesize all essential nutrients for *C. elegans*. Both metabolic  
54 models and experimental analyses further revealed that nutrient context can influence  
55 how bacteria interact within the microbiome. We identified key bacterial traits that are  
56 likely to influence the microbe's ability to colonize *C. elegans* (e.g., pyruvate  
57 fermentation to acetoin) and the resulting effects on nematode fitness (e.g.,  
58 hydroxyproline degradation). Considering that the microbiome is usually neglected in the  
59 comprehensive research on this nematode, the resource presented here will help our  
60 understanding of *C. elegans* biology in a more natural context. Our integrative approach  
61 moreover provides a novel, general framework to dissect microbiome-mediated  
62 functions.

## 63 **Introduction**

64 Multicellular organisms are continuously associated with microbial communities. The  
65 ongoing interactions are likely to have influenced evolution of the involved microbes and  
66 hosts, affecting bacterial growth characteristics or host development, metabolism,  
67 immunity, and even behavior (1). Host organisms and their associated microorganisms  
68 (i.e., the microbiome) are thus widely assumed to form a functional unit, the  
69 metaorganism, where microbial traits expand host biology (2). To date, most microbiome  
70 studies focus on describing the taxonomic composition of associated communities, using  
71 16S rRNA amplicon sequencing (3). These studies revealed that specific taxa reliably  
72 associate with certain hosts, for example Bacteroidetes and Firmicutes with humans,  
73 *Snodgrassella* and *Gilliamella* with honeybees, or *Lactobacillus* and *Acetobacter* with  
74 *Drosophila* (4–6). 16S profiling, however, is insufficient to identify bacterial functions of  
75 importance for the interaction (7). More detailed information can be obtained from  
76 bacterial genome sequences. For example, genomic analysis of the dominant members  
77 of the bee microbiome revealed complementary functions in carbohydrate metabolism,  
78 suggesting syntrophic interactions among coexisting bacteria (8). Further, the systems  
79 biology approach of constraint-based modeling permits inference of genome-scale  
80 metabolic models as a basis for predicting microbial phenotypes (9), as previously  
81 demonstrated for the interaction between whiteflies and their endosymbionts (10,11) and  
82 also hosts with more complex microbiomes (12,13).

83 The nematode *Caenorhabditis elegans* is one of the main model organisms in  
84 biomedical research. Yet, almost all research with this nematode has been performed in  
85 the absence of its native microbiome. In fact, its microbiome was only characterized

86 recently, consisting mostly of Gammaproteobacteria (*Enterobacteriaceae*,  
87 *Pseudomonaceae*, and *Xanthomonodaceae*) and Bacteroidetes (*Sphingobacteriaceae*,  
88 *Weeksellaceae*, *Flavobacteriaceae*) (14–17). The little currently available data on  
89 microbiome functions highlights an influence on *C. elegans* fitness, stress resistance,  
90 and protection against pathogens (15). Previous studies also combined *C. elegans* with  
91 various soil bacteria, revealing that these can provide specific nutrients (18–22) or affect  
92 the response to drugs against cancer and diabetes (23–26). To date, the functions of the  
93 native microbiome have not yet been systematically explored.

94 The aim of this study was to establish the natural *C. elegans* microbiome as a model for  
95 studying microbiome functions. We extended previous 16S rRNA data (15) by  
96 sequencing whole genomes for 77 bacteria, which are associated with *C. elegans* in  
97 nature, and also *Escherichia coli* OP50, the nematode’s standard laboratory food. We  
98 reconstructed metabolic networks from the genome data to explore the metabolic  
99 competences and resulting interaction potential of the microbiome. We additionally  
100 characterized bacterial physiology and assessed which bacterial traits shape  
101 colonization ability and influence *C. elegans* fitness.

## 102 **Material and Methods**

### 103 *Material*

104 Microbiome strains were previously isolated from natural *C. elegans* isolates or  
105 corresponding substrates in Northern Germany (15; Supplementary Table S1). A  
106 representative set of 77 strains was chosen for genome sequencing. For physiological  
107 analysis, bacteria were cultured in tryptic soy broth (TSB) at 28 °C. For experiments with  
108 *C. elegans* N2, bacterial TSB cultures (500 µl at OD<sub>600</sub> = 10) were spread onto peptone-  
109 free medium (PFM) agar plates. Maintenance and bleaching, to obtain gnotobiotic, age-  
110 synchronized worms, followed standard methods (27).

### 111 *Genome sequencing*

112 Total DNA was isolated from bacterial cultures using a cetyl-trimethyl-ammonium-bromid  
113 (CTAB) approach (28). Sequencing was based on Illumina HiSeq and in a subset of nine  
114 strains additionally the PacBio platform (Supplementary Table S1). For PacBio long read  
115 genome sequencing, SMRTbell™ template library was prepared according to the  
116 manufacturer's instructions (Pacific Biosciences, US; Protocol for Greater Than 10 kb  
117 Template Preparation). SMRT sequencing was carried out on the PacBio RSII (Pacific  
118 Biosciences, US) on one to three SMRT Cells, applying a movie length of 240-minutes.  
119 SMRT Cell data was assembled using the RS\_HGAP\_Assembly.3 protocol (SMRT  
120 Portal version 2.3.0). Chromosomes and chromids were circularized, unusual  
121 redundancies at the ends of the contigs and artificial contigs were removed after a  
122 comparison against all other replicons. Error correction was performed by Illumina reads  
123 mapping onto finished genomes using BWA (29) with subsequent variant and  
124 consensus calling using VarScan (30). QV60 consensus concordances were confirmed

125 for all genomes. Annotations were obtained with the NCBI Prokaryotic Genome  
126 Annotation Pipeline (PGAP). For samples with only Illumina data, low quality reads  
127 and/or adaptors were trimmed with Trimmomatic v0.36 (31). *De novo* genomes were  
128 assembled using SPAdes v3.8.0 (32). Genomes (contigs greater than 1000 bp) were  
129 annotated with PGAP and Prokka v1.11 (33). Genomes were compared with BRIG (34).  
130 All sequences are available from NCBI Genbank, Bioproject PRJNA400855.

### 131 *Reconstruction of metabolic networks*

132 Metabolic networks were reconstructed as a basis for all subsequent computational  
133 metabolic analyses and followed a two-step pipeline (Fig. 1a). First, the sequenced  
134 genomes were used to create draft metabolic models, using ModelSEED version 2.0  
135 (35) and associated SEED reaction database. Second, we corrected errors and  
136 extended drafts by (i) finding futile cycles, (ii) allowing growth with the isolation medium  
137 (TSB), (iii) improving biosynthesis of biomass components, (iv) extending capacities to  
138 use different carbon sources, and (v) checking for additional fermentation products. This  
139 curation was based on combining topological- and sequenced-based gap filling using  
140 gapseq (version 0.9 “darwinian turtle”; <https://github.com/jotech/gapseq>), pathway  
141 definitions of the MetaCyc database release 22 (36), and sequence data from UniProt  
142 (37). The presence of enzymatic reactions was inferred by BLAST with bitscore of at  
143 least 50 ( $\geq 150$  for a more conservative estimation), and a 75% minimum query  
144 coverage. Moreover, reactions were assumed to be present if overall pathway  
145 completeness was higher than 75% or if it was higher than 66% and key enzymes of the  
146 pathway were present (36). We also searched for genes possibly relevant in host-  
147 microbe interactions using the virulence factor database (38). The resulting curated

148 models (Supplementary data S1) were used for further metabolic network analysis.  
149 Computations were done with GNU parallel (39).

### 150 *Phylogenetic correlation and clustering of metabolic pathways*

151 We assessed whether similarity of metabolic reactions correlated with phylogenetic  
152 relationship, using pairwise comparisons of bacteria. For each pair, the overlap of  
153 present and absent pathways (predicted by gapseq) was calculated. The corresponding  
154 16S rRNA similarity was scored as percent identity of the global alignment using  
155 biostrings (40). 16S data was obtained from the SILVA database (41) based on the best  
156 hit of the extracted genomic 16S rRNA using RNAmmer (42). To determine overall  
157 metabolic distances between isolates, metabolic networks were treated as vectors,  
158 clustered horizontally, and metabolic distances computed as Euclidean distances  
159 between vectors. Cluster similarity was estimated by average linkage and assessed via  
160 multi-scale bootstrapping (10,000 replications) using pvclust (43).

### 161 *BIOLOG experiments*

162 We used BIOLOG GN2 plates to assess the metabolic competence of selected bacterial  
163 strains, including MYb10, MYb11, MYb71, MYb237, and OP50. Bacterial cultures were  
164 washed three times using phosphate buffered saline (PBS) and density adjusted to  
165  $OD_{600} = 1$ . 150  $\mu$ l bacterial suspension per each well of BIOLOG plate were incubated at  
166 28 °C for 46 h. Tetrazolium dye absorption ( $OD_{595}$ ) was measured every 30 min (three  
167 replicates per strain). We defined the magnitude of substrate reduction as the fold-  
168 change in tetrazolium absorbance:

$$169 \quad \text{fold change} = \frac{OD_{t46} - OD_{t0}}{OD_{t0}} - OD_{control}$$



170 Fold-changes in water were subtracted as background. Hierarchical clustering of strains  
171 was based on average fold-change profiles (Ward's clustering; Euclidean distance) and  
172 bootstrapping ( $n = 100$ ). To analyze metabolic specialization, k-means clustering of  
173 substrates ( $k = 7$ ,  $n = 10^3$ ; (44)) was performed (Supplementary Fig. S1). Statistical  
174 analyses were performed in R version 3.3.1 (45) and ggplot2 (46).

### 175 *Bacterial growth experiments*

176 To validate BIOLOG results, we assessed growth of MYb11, MYb71, and a co-culture of  
177 both in defined media with either alpha-D-glucose or D-(+)-sucrose as carbon sources.  
178 Our defined medium is related to S medium (27), and contains 0.3% NaCl, 1 mM  
179  $MgSO_4$ , 1 mM  $CaCl_2$ , 25 mM  $KPO_4$ , 0.1%  $NH_4NO_3$ , 0.05 mM EDTA, 0.025 mM  $FeSO_4$ ,  
180 0.01 mM  $MnCl_2$ , 0.01 mM  $ZnSO_4$ , 0.01 mM  $CuSO_4$ , and 1% carbon source. Defined  
181 medium without carbon source served as negative and TSB as positive control.  
182 Overnight cultures were washed and adjusted to  $3.94 \times 10^7$  CFUs for growth  
183 experiments. Microtiter plates were incubated as BIOLOG plates above.  $OD_{600}$  was  
184 measured every 30 min, and cultures plated after 48 h. Selective plating of MYb71 using  
185 kanamycin (10  $\mu g/ml$ ) allowed to quantify MYb11/MYb71 proportions in co-culture.  
186 Three independent runs with technical replicates were performed and assessed with  
187 Mann-Whitney U-tests and P-value adjustment by false discovery rate (fdr).

### 188 *Simulation of bacterial in silico growth*

189 We used the curated models to simulate the growth of MYb11 and MYb71 with sucrose  
190 as carbon source. We searched for sucrose invertases using gapseq  
191 (<https://github.com/jotech/gapseq>) and secreted peptides with SignalP 4.1 (47). *In silico*  
192 growth was simulated with BacArena (48). The MYb71 extracellular sucrose invertase

193 was modeled as independent species with a single sucrose invertase reaction and  
194 exchange reactions for sucrose, glucose, and fructose. Carbon source utilization and  
195 metabolic by-products were predicted using flux balance analysis and flux variability  
196 analysis in R with sybil (49). A carbon source was assumed to be utilizable if the minimal  
197 solution of the corresponding exchange was negative (i.e., uptake) and a byproduct  
198 producible if the maximal solution of exchange positive (i.e., production).

### 199 *Simulation of ecological interactions*

200 We assessed possible interactions among bacteria based on joined models, assuming a  
201 common compartment for metabolite exchange between microbes. Activity of individual  
202 reactions (i.e., fluxes) was linearly coupled to biomass production to prevent unrealistic  
203 exchange fluxes, such as those that solely benefit the partner but not the producer (50).  
204 The objective function was set to maximize the sum of fluxes through both biomass  
205 reactions. Two growth media were used for simulations, including TSB and a glucose  
206 minimal medium with thiamine and traces (0.001 mM) of sucrose and methionine to  
207 allow initial bacterial growth (Supplementary Table S3). Joined growth rates ( $j_1$ ,  $j_2$ ) were  
208 compared to single growth rates ( $s_1$ ,  $s_2$ ). Mutualism was defined as  $j_1 > s_1$  and  $j_2 > s_2$ ,  
209 competition as  $j_1 < s_1$  and  $j_2 < s_2$ , parasitism as  $j_1 < s_1$  and  $j_2 > s_2$  (or *vice versa*), and  
210 commensalism as  $j_1 = s_1$  and  $j_2 > s_2$  (or the reverse).

### 211 *Experimental analysis of bacterial colonization and bacterial effects on C. elegans* 212 *population growth*

213 We examined bacterial colonization by quantifying CFUs extracted from young adult  
214 worms exposed to bacteria for 24 h. In detail, L4 larvae were placed on bacterial isolates  
215 (500  $\mu$ l,  $OD_{600} = 10$ ) for 24 h, washed in a series of buffers (2x M9 buffer with 25 mM

216 tetramisole, 2x M9 with 25 mM tetramisole and 100 µg/ml gentamicin, 1x PBS with  
217 0.025% Triton-X) to remove bacteria from the surface of nematodes, and homogenized  
218 in the GenoGrinder 2000 using 1 mm zirconia beads (1200 strokes/min, 3 min). Worm  
219 homogenate and supernatant control were plated onto TSA for quantification.

220 We further measured worm population growth as a proxy for worm fitness. We counted  
221 worms in the population initiated with three L4 after five days at 20 °C on bacterial  
222 lawns.

### 223 *Regression models*

224 We analyzed the association between phenotypic measurements (i.e., bacterial  
225 colonization and worm fitness) and metabolic as well as virulence characteristics using  
226 Spearman rank correlation and random forest regression analysis. Significance for the  
227 correlation analysis was assessed with permutation tests using 100 randomly generated  
228 features and FDR-adjusted P-values. For random forest regression, the R package  
229 VSURF was used to select features based on permutation-based score of importance  
230 (51) and otherwise default settings (ntree = 2000, ntry = p/3).

### 231 *Adaptive strategies*

232 According to the universal adaptive strategy theory (UAST) (52,53), heterotrophic  
233 bacteria follow one of three strategies: i) rapid growth and thus good competitor, ii) high  
234 resistance and thus stress-tolerator, or iii) fast niche occupation and thus ruderal. We  
235 categorized bacterial isolates using published UAST criteria (53), based on three scores,  
236 inferred from the genomes and metabolic models. In detail, the components of a  
237 competitive strategy were a large genome size, antibiotics production (presence of  
238 pathways belonging to 'Antibiotic-Biosynthesis' category in MetaCyc), high catabolic

239 diversity (Metacyc: 'Energy-Metabolism'), and siderophore biosynthesis (Metacyc:  
240 'Siderophores-Biosynthesis'). The criteria for stress-tolerators were auxotrophies, slow  
241 growth rates in TSB, few rRNA copies, and exopolysaccharides production (MetaCyc  
242 pathways: PWY-6773, PWY-6655, PWY-6658, PWY-1001, PWY-6068, PWY-6082,  
243 PWY-6073). The hallmarks of a ruderal strategy were fast growth in TSB, multiple rRNA  
244 copies, and low catabolic diversity (Metacyc: 'Energy-Metabolism'). The characteristics  
245 of each isolate were related to those of the other microbiome members, yielding a  
246 relative score, thereby assuming that different strategies are present in the microbial  
247 community as a whole. For each isolate, we assessed whether the inferred value  
248 belonged to the lower or upper quantile of this criterium (in case of growth rates we used  
249 the mean instead). The total adaptive score per strategy was scaled by the number of  
250 features considered for a particular strategy. An isolate was assumed to follow the  
251 strategy, for which it produced the highest score. If two strategies had the same score,  
252 then isolates were considered to follow a mixed strategy.

253 **Results**

254 *Genomes of bacterial isolates, reconstruction and validation of metabolic networks*

255 We obtained whole genome sequences for 77 bacterial isolates of the *C. elegans*  
 256 microbiome (Table 1). Of these, nine were sequenced with PacBio technology, allowing  
 257 their full assembly, yielding either a single circular chromosome (four strains) or three  
 258 circular chromosomes/chromids in case of the five isolates of the genus *Ochrobactrum*,  
 259 which is known to have more than one chromosome (54)(Supplementary Table S1,  
 260 underlined). The remaining isolates were sequenced with Illumina only, resulting in  
 261 assemblies with 11 up to 243 contigs. For four genera (*Ochrobactrum*, *Pseudomonas*,  
 262 *Arthrobacter*, *Microbacterium*), we included more than five strains and identified  
 263 substantial intra-generic genome variation (Supplementary Fig. S2).

264

265 **Table 1: Overview of bacterial isolates from the natural microbiome of *C. elegans***  
 266 **included in this study**

| Phylum              | Order            | Genus                    | Isolate                                                                                                                                         |
|---------------------|------------------|--------------------------|-------------------------------------------------------------------------------------------------------------------------------------------------|
| Proteobacteria      | Xanthomonadales  | <i>Stenotrophomona</i>   | MYb238, <b>MYb57</b>                                                                                                                            |
| Proteobacteria      | Pseudomonadales  | <i>Pseudomonas</i>       | MYb1, MYb114, MYb115, MYb117, MYb12, MYb13, MYb16, MYb17, MYb184, MYb185, MYb2, MYb22, MYb3, MYb60, MYb75, <b>MYb11</b> , MYb187, <b>MYb193</b> |
| Proteobacteria      | Pseudomonadales  | <i>Acinetobacter</i>     | MYb10                                                                                                                                           |
| Proteobacteria      | Enterobacterales | <i>Erwinia</i>           | MYb121                                                                                                                                          |
| Proteobacteria      | Enterobacterales | <i>Escherichia</i>       | MYb137, MYb5, OP50                                                                                                                              |
| Terrabacteria group | Actinobacteria   | <i>Micrococcaceae</i>    | MYb211, MYb213, MYb214, MYb216, MYb221, MYb222, MYb224, MYb227, MYb229, MYb23, MYb51                                                            |
| Terrabacteria group | Actinobacteria   | <i>Microbacteriaceae</i> | MYb24, MYb32, MYb40, MYb43, MYb45, MYb50, MYb54, MYb62, MYb64, MYb66, MYb72                                                                     |

|                     |                    |                         |                                                                                                                     |
|---------------------|--------------------|-------------------------|---------------------------------------------------------------------------------------------------------------------|
| FCB group           | Bacteroidetes      | <i>Flavobacteriales</i> | MYb25, MYb44, MYb7                                                                                                  |
| Proteobacteria      | Caulobacterales    | <i>Brevundimonas</i>    | MYb31, MYb33, MYb46, MYb52                                                                                          |
| Terrabacteria group | Bacilli            | <i>Paenibacillaceae</i> | MYb63                                                                                                               |
| Proteobacteria      | Rhizobiales        | <i>Ochrobactrum</i>     | <b>MYb6</b> , MYb14, <b>MYb15</b> , MYb18, MYb19, MYb29, <b>MYb49</b> , <b>MYb58</b> , MYb68, <b>MYb71</b> , MYb237 |
| Proteobacteria      | Burkholderiales    | <i>Achromobacter</i>    | MYb9, <b>MYb73</b>                                                                                                  |
| Terrabacteria group | Bacilli            | <i>Bacillaceae</i>      | MYb48, MYb56, MYb67, MYb78, MYb209, MYb212, MYb220                                                                  |
| Bacteroidetes       | Sphingobacteriales | <i>Sphingobacterium</i> | MYb181                                                                                                              |
| Actinobacteria      | Actinomycetales    | <i>Rhodococcus</i>      | MYb53                                                                                                               |

267 Strains with PacBio sequencing data are given in bold.

268

269 To study the functional repertoire of the microbiome, we reconstructed genome-scale  
270 metabolic models (Fig. 1a, Supplementary data S1). The initial metabolic models were  
271 curated by screening for transporter proteins and filling of missing reactions (gap-filling).  
272 Curation increased model quality, including doubling of the number of utilized carbon  
273 sources, reduction in the absence of essential biosynthesis pathways (e.g., for  
274 nucleotides or amino acids) from 60% to below 10%, and reduction in the required  
275 additional compounds for growth on defined media from on average six to one (Fig. 1b).  
276 In order to validate our metabolic models, we experimentally quantified the ability of five  
277 selected bacterial isolates to utilize 46 carbon sources using the BIOLOG approach. The  
278 BIOLOG results produced a 49.6% overlap with the initial draft models and an increase  
279 to 70% overlap with the curated models (Fig. 1c and Supplementary Fig. S9). These  
280 curated models were subsequently used to explore bacterial metabolic competences.

281

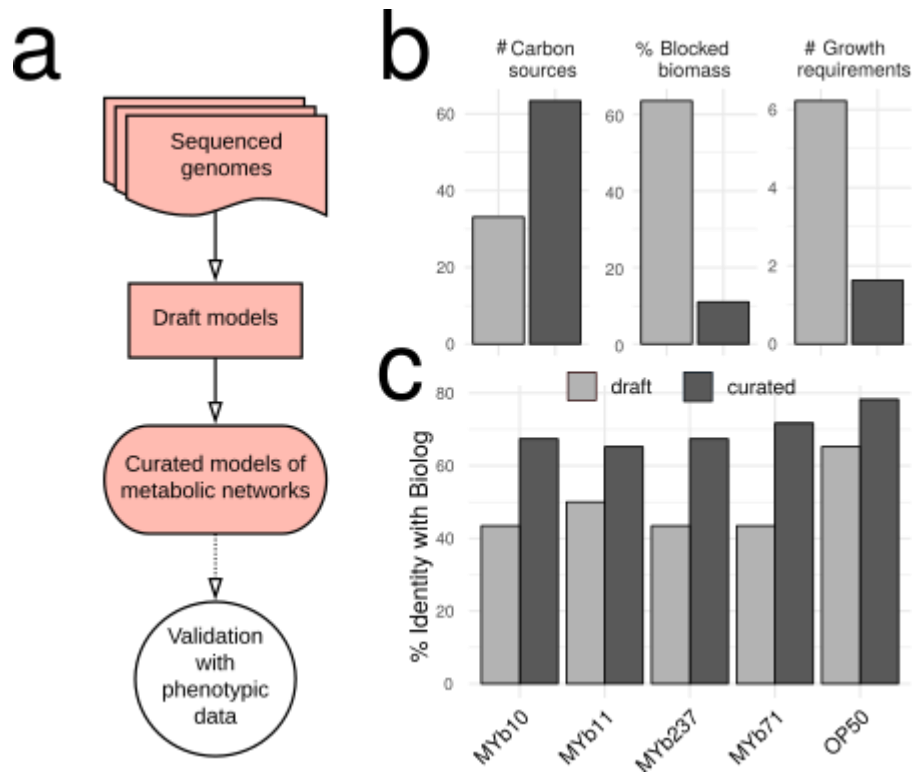

282

283 **Fig. 1. Genomes of bacterial isolates, reconstruction and validation of metabolic**

284 **networks.** (a) Pipeline for metabolic network reconstruction. Sequenced genomes were

285 used to create draft metabolic models. Draft models were curated using topological- and

286 sequenced-based gap filling. The resulting models were validated with physiological

287 data (BIOLOG GN2; see Fig. 3); these models represent the metabolic networks of

288 microbiome isolates and were used for functional inference. (b) Model improvements by

289 curation, leading to an increase in accurate prediction of uptake of carbon sources, and

290 decreases in the prediction of non-producible biomass components and the number of

291 components needed for growth. (c) Model curation improved agreement with

292 experimental data, as for example the BIOLOG results.

293

294

295

296 *Metabolic diversity within the microbiome of C. elegans*

297 Using the metabolic networks, we assessed a possible relationship between metabolic  
298 and phylogenetic similarities and explored the metabolic potential of the isolates. We  
299 found that the information contained in pairwise 16S rRNA phylogenetic relationships is  
300 generally indicative of the corresponding similarities in metabolic networks (Fig. 2a;  
301 Spearman rank correlation,  $R_s = 0.6199$ ,  $P < 0.0001$ ). Metabolic similarities appeared to  
302 be higher than phylogenetic relationships, suggesting a considerable overlap in  
303 metabolic competences across the included isolates. Nevertheless, some variation was  
304 identified, even among isolates from the same genus. Such variation within taxonomic  
305 groups was confirmed through hierarchical clustering of the inferred metabolic networks  
306 (Fig. 2b), as for example seen for the *Pseudomonas* isolates, which contain three clearly  
307 separated clusters. Similar patterns are also observed for other genera, for example  
308 *Enterobacter*, *Ochrobactrum*, or *Microbacterium*. We conclude that variation in metabolic  
309 competences is generally related to the bacterial phylogeny albeit some variation being  
310 present within genera.

311



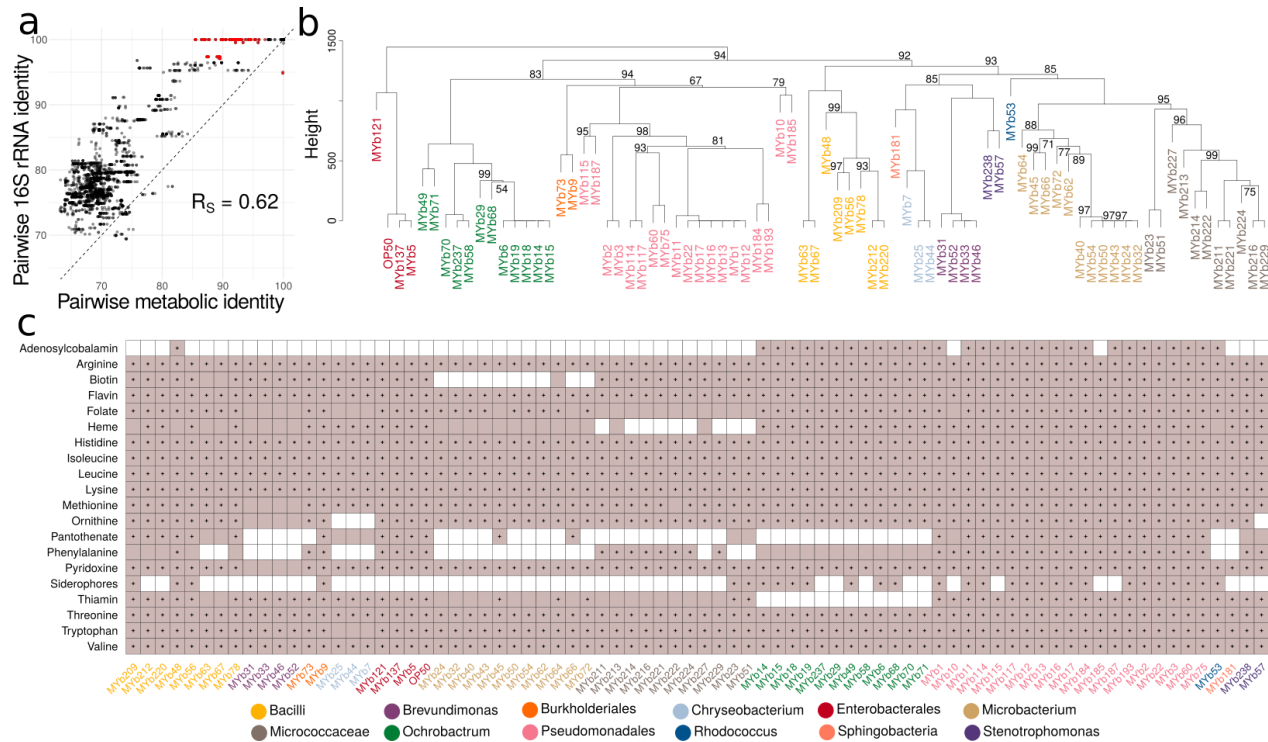

312

313 **Fig. 2. Metabolic network clustering and distribution of important pathways.** (a)

314 Correlation between pairwise similarities in 16S rRNA sequences and metabolic

315 networks is shown. Red indicates pairs with a 16S rRNA identity above 97% and

316 metabolic identity below 97% and vice versa. (b) Hierarchical clustering of metabolic

317 networks based on pathway prediction. P-values were calculated via multiscale

318 bootstrap resampling. In case of full support (i.e.,  $P = 100$ ), P-values are not shown (For

319 a complete list of different unbiased P-values and bootstrap values see Supplementary

320 Figure S11). (c) Prediction of bacterial capacity to produce metabolites favoring *C.*

321 *elegans* growth. Filled squares in light purple indicate that the metabolic networks

322 predict presence of the biosynthetic pathway required to produce essential amino acids

323 and co-factors. Black dots within the filled squares indicate that pathway presence is

324 supported by more conservative parameters (BLAST bit score  $\geq 150$ ). Different

325 bacterial genera in (b) and (c) are indicated by different colors of the strain names (Table  
326 1).

327

328 We next assessed the metabolic competences of the microbiome isolates  
329 (Supplementary Table S4). In general, the inferred metabolic competences are  
330 consistent with the aerobic and heterotrophic lifestyle of the *C. elegans* host. The  
331 glycolysis, at least the partial pentose phosphate pathway, the tricarboxylic acid cycle,  
332 and enzymes enabling oxidative phosphorylation (cytochrome oxidases) were present in  
333 all genomes. Almost all isolates possessed enzymes enabling tolerance to microaerobic  
334 conditions (e.g., cytochrome bd oxidase). Some isolates from Bacilli, *Pseudomonas*, and  
335 *Ochrobactrum* showed sequence-evidence for chemolithotrophic life style (nitrite and  
336 formate oxidation) and anaerobic respiration (nitrate, arsenate reduction). Pathways  
337 related to CO<sub>2</sub> fixation (reductive TCA or anaplerosis) were found in a few  
338 *Pseudomonas*, Bacilli, or *Microbacterium* isolates. Two Bacillales strains further showed  
339 capacity to degrade polysaccharides, such as starch, cellulose, mannan,  
340 rhamnogalacturonan (e.g., *Paenibacillus* MYb63, *Bacillus* MYb67). The microbiome  
341 members are able to produce all essential substances required for *C. elegans* growth,  
342 which the nematode cannot synthesize on its own (i.e., all essential amino acids and  
343 vitamins; Fig. 2c). Most variation among isolates was observed in the biosynthetic  
344 pathways of B12, pantothenate, phenylalanine and siderophores (Fig. 2c). Simulation of  
345 *in silico* growth (Supplementary Fig. S9) suggests that simple sugars, such as glucose,  
346 ribose or arabinose, can be used by all organisms while the ability to degrade lactose,  
347 maltodextrin, or sucrose varies among strains. Short chain fatty acids were among the

348 compounds that can be generated by all organisms (Supplementary Fig. S9), while there  
349 was variation in the ability to produce succinate, cysteine, and valine. Moreover, several  
350 microbiome members possessed potential virulence genes, especially the  
351 *Pseudomonas* and *Escherichia* isolates (Supplementary Table S5).

352 We subsequently focused our analysis on *Ochrobactrum* and *Pseudomonas* isolates.  
353 These two genera are enriched in the native microbiome of *C. elegans*, comprising 10–  
354 20 % of the associated bacteria, they are also particularly well able to colonize the  
355 nematode gut (15), and some isolates can protect *C. elegans* from pathogen infection  
356 (15,55). Most *Pseudomonas* isolates can provide all required substances for nematode  
357 growth. *Ochrobactrum* isolates are able to produce vitamin B12, like *Pseudomonas*  
358 isolates, but unlike almost any of the other microbiome members (Fig. 2c). Moreover,  
359 the *Ochrobactrum* isolates vary from other microbiome members in degradation  
360 pathways, energy metabolism, vitamin biosynthesis, and presence of potential virulence  
361 factors (Supplementary Table S6). These isolates appear to lack some for *C. elegans*  
362 relevant vitamin biosynthetic pathways, such as those leading to thiamine and  
363 panthothenate. They possess a unique Brucella-like putatively immune-modulating LPS  
364 (Supplementary Table S5).

365 In summary, we found that *C. elegans* harbors a microbial community with diverse  
366 metabolic competences, which can supply all essential nutrients for *C. elegans* and  
367 which includes several *Ochrobactrum* and *Pseudomonas* isolates capable of producing  
368 important vitamins such as vitamin B12.

369

370 *Nutrient context influences ecological interactions within the microbiome*

371 To study how metabolic repertoires affect bacterial growth and interactions within the  
372 microbiome, we characterized carbon source utilization of selected isolates and tested  
373 growth in different nutrient environments *in vitro* and *in silico*. Using the BIOLOG  
374 approach, we focused on prominent *C. elegans* microbiome members that colonize  
375 worms and affect host fitness, including *Ochrobactrum* sp. MYb71, *Ochrobactrum* sp.  
376 MYb237, *Acinetobacter* sp. MYb10, *Pseudomonas lurida* MYb11, and as a contrast the  
377 laboratory food strain *E. coli* OP50 (Supplementary Fig. S3; (15)). For a first insight into  
378 bacterial interactions, we additionally included a MYb11-MYb71 mixture (two strains that  
379 can co-exist in *C. elegans* (15)). We found that the metabolic repertoires of the strains  
380 differ and that the four microbiome isolates can be distinguished from OP50 based on  
381 the metabolism of carboxylic and amino acids (Fig. 3a, cluster II; Supplementary Fig.  
382 S4). Within the microbiome, MYb10 was least versatile at using carboxylic acids and  
383 sugar alcohols (Fig. 3a, cluster IV), while MYb11 and the two *Ochrobactrum* strains  
384 could additionally metabolize unique sets of carboxylic acids and sugar alcohols,  
385 respectively (Fig. 3a, cluster V and III). Notably, the disaccharides sucrose and turanose  
386 were only metabolized by MYb71 (alone and in co-culture) (Fig. 3a, cluster III), although  
387 sucrose invertases were present in the genomes of both MYb71 and MYb11 (cf.  
388 pathway: sucrose degradation I, Supplementary Table S4). In co-culture, the metabolic  
389 repertoires of MYb11 and MYb71 appeared additive.

390

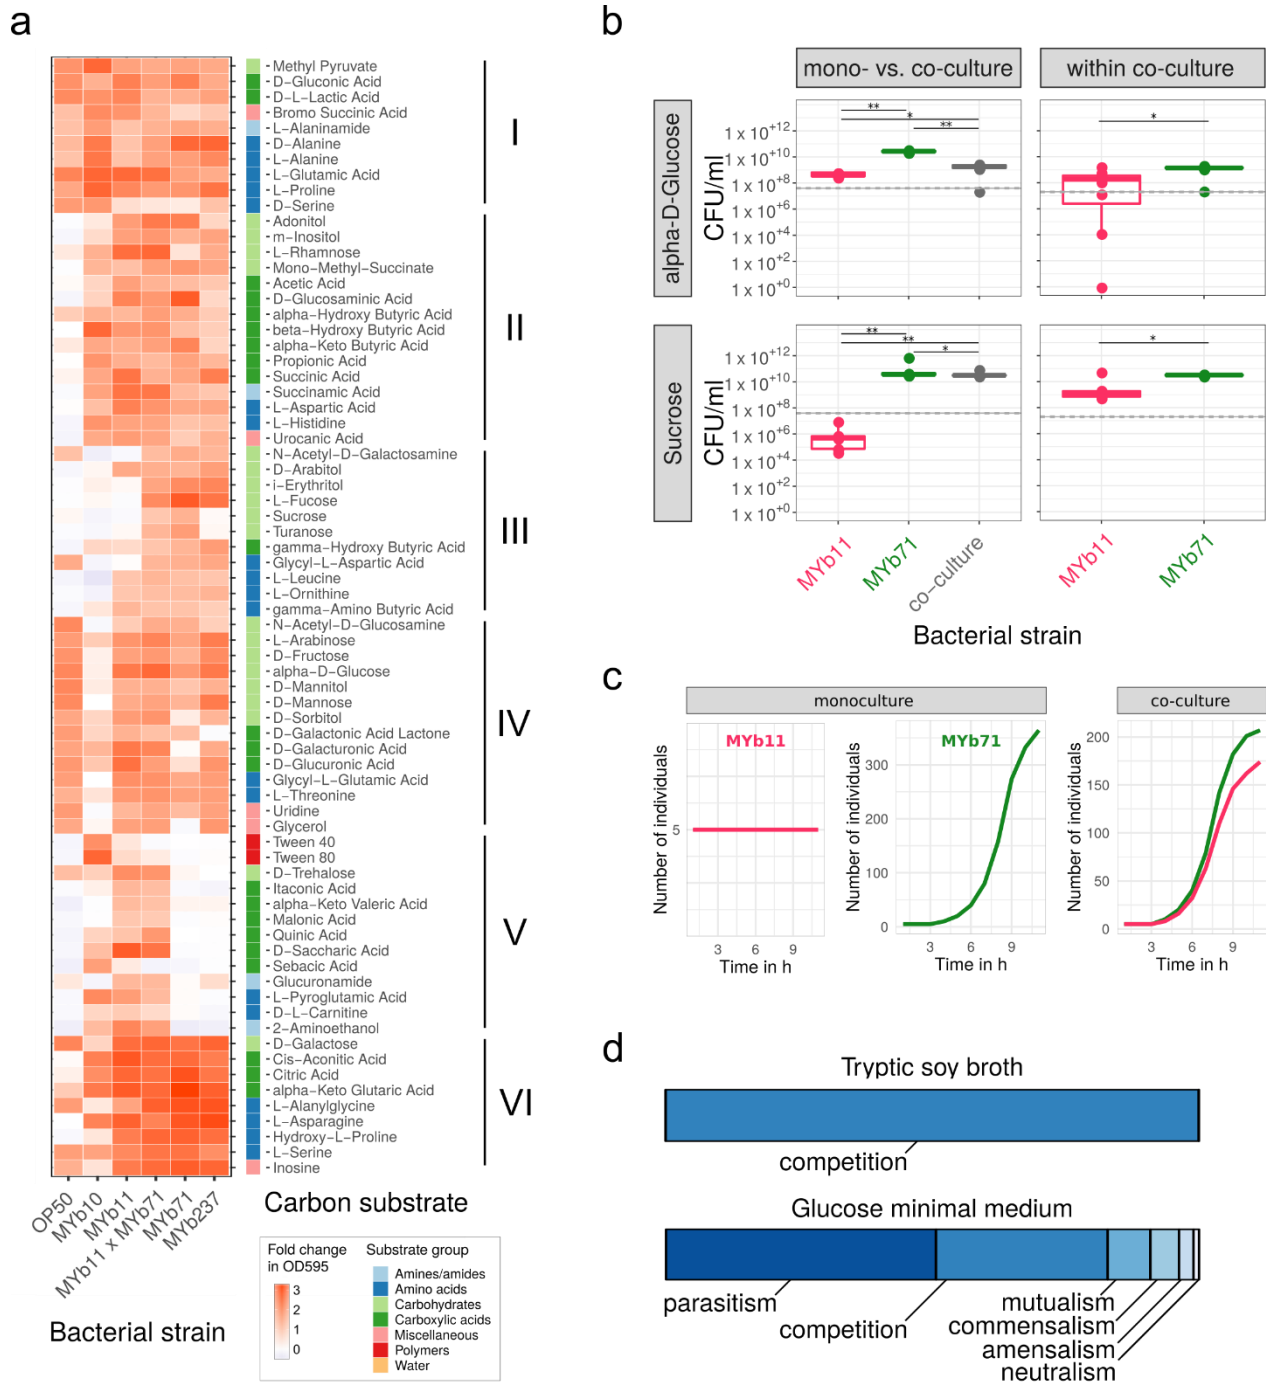

391

392 **Fig. 3. Realized carbon metabolism and growth.** (a) Profiles of carbon substrate use

393 of *Acinetobacter* sp. (MYb10), *Pseudomonas lurida* (MYb11), *Ochrobactrum* sp.

394 (MYb71), *Ochrobactrum* sp. (MYb237), and *E. coli* OP50 in BIOLOG GN2 plates over 46

395 h. The fold-change in indicator dye absorption from 0 to 46 h indicates that the particular

396 compound is metabolized. K-means clustering ( $k = 7$ ) of substrates by fold-change  
397 highlights metabolic differences between strains. See Supplementary Fig. S5 for cluster  
398 VII with substrates used poorly across most strains. (b) Colony forming units per ml  
399 (CFU/ml) of MYb11 and MYb71 in mono- and co-culture at 48 h in alpha-D-glucose and  
400 sucrose-containing minimal media. The horizontal and dashed lines indicate mean and  
401 SD of CFU/ml at inoculation. Statistical differences were determined using Mann-  
402 Whitney U-tests and corrected for multiple testing using *fdr*, where appropriate.  
403 Significant differences are indicated by stars (\*\* for  $p < 0.01$ ; \* for  $p < 0.05$ ). Data from  
404 three independent experiments is shown. (c) *In silico* growth of MYb11 and MYb71 in  
405 mono- and co-culture in sucrose-thiamine medium using BacArena with an arena of  
406 20x20 and five initial cells per species. (d) Bacterial interaction types observed during *in*  
407 *silico* co-cultures of all combinations of the 77 microbiome isolates and OP50.

408  
409  
410 We next assessed whether the differences in MYb11 and MYb71 metabolic  
411 competences shape bacterial interactions in growth media with only a single carbon  
412 source. We did not observe any growth in a control medium without a carbon source,  
413 and thus conclude that the tested bacteria are not chemoautotrophic (Supplementary  
414 Fig. S6). In minimal medium with alpha-D-glucose, both MYb11 and MYb71 grew, yet  
415 exhibited distinct growth dynamics (Fig. 3b; Supplementary Fig. S6). MYb71 produced  
416 more CFUs than MYb11 in co-culture (Fig. 3b), suggesting that MYb71 has a growth  
417 advantage over MYb11 and/or interferes with MYb11 in some other way. In agreement  
418 with the BIOLOG results, a medium including sucrose as the sole carbon source

419 supported only growth of MYb71 but not MYb11 in monoculture (Fig. 3b, Supplementary  
420 Fig. S6). Surprisingly, MYb11 increased in CFUs in co-culture, while in monoculture  
421 MYb11 CFUs declined over time, indicating parasitic growth (Fig. 3b). Thus, the  
422 presence of different carbon sources can change the interaction type between two  
423 isolates.

424 We subsequently analysed in more detail the basis for co-growth of MYb11 and MYb71  
425 in sucrose medium, using genome sequence information and *in silico* growth  
426 simulations. Interestingly, we found a secreted sucrose invertase in the genome of  
427 MYb71 but not MYb11 (Supplementary Fig. S10). *In silico* growth simulations  
428 demonstrated that MYb71 can grow in sucrose medium, MYb11 alone does not, while in  
429 co-culture both increased in numbers (Fig. 3c). The simulations thereby re-captured the  
430 *in vitro* findings of distinct growth patterns in sucrose medium. Genome sequence  
431 information strongly suggests that growth of both in co-culture is mediated by a secreted  
432 enzyme from MYb71.

433 Taking a more global perspective, we next investigated *in silico* the potential ecological  
434 interactions among the 77 microbiome isolates and *E. coli* OP50. We compared the  
435 growth characteristics of single bacteria with co-growth rates of all 3003 possible  
436 bacterial pairs in different nutrient environments. In a rich medium (TSB), the exclusive  
437 interaction type was competition, indicated by lower growth rates in co- vs. mono-culture  
438 (Fig. 3d). This changed completely when the nutrient environment was simplified to a  
439 glucose minimal medium: 50% of the interactions were parasitic (i.e., the growth rate for  
440 one isolate was higher in co-culture than in monoculture, while this pattern was opposite  
441 for the other isolate of a pair), one out of three interactions were competitive, and 8%

442 mutualistic (i.e., growth rates for both isolates higher in co-culture than the  
443 monocultures; Fig. 3d). Under these minimal medium conditions, the most frequently  
444 exchanged metabolites across bacteria were glyceraldehyde, acetate, and ethanol  
445 (Supplementary Fig. S7). We conclude that the nutrient context modulates bacterial  
446 growth, consistently identified both *in silico* and *in vitro*, and thereby shapes bacteria-  
447 bacteria interactions within the microbiome.

448  
449 *Specific metabolic competences predict bacterial colonization ability and bacterial*  
450 *effects on nematode fitness*

451 To characterize traits involved in the interaction between bacteria and *C. elegans*, we  
452 identified genomic and metabolic features that are associated with the bacteria's  
453 colonization ability and their effects on worm fitness. We focused on 18 microbiome  
454 isolates based on (i) their abundance in the *C. elegans* microbiome, (ii) enrichment in  
455 worms, and (iii) effects on worm population growth (15,56). OP50 was included as  
456 control. Our phenotypic analysis revealed substantial variation among bacterial isolates  
457 in both their ability to colonize *C. elegans* and their effects on nematode fitness (Fig. 4;  
458 Supplementary Fig. S3). Importantly, these two microbiome characteristics were  
459 significantly related with certain metabolic competences of the bacteria. Pyruvate  
460 fermentation to (S)-acetoin was significantly associated with bacterial load and the  
461 degradation of trans-3-hydroxyproline with nematode population growth (Fig. 4,  
462 Supplementary Table S8).

463



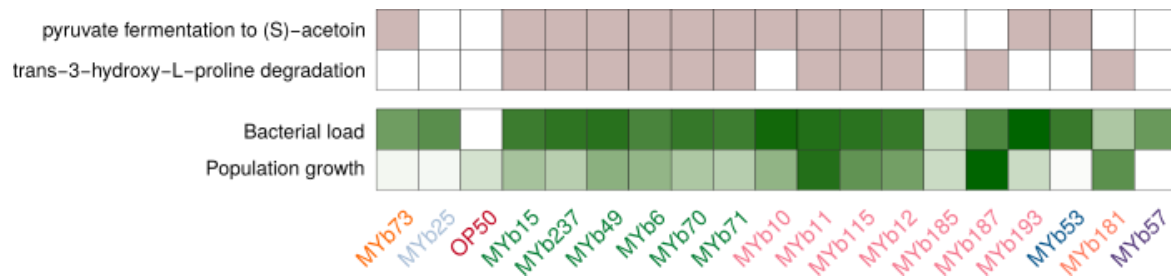

464

465 **Fig. 4. Relationship of bacterial metabolic competences with their colonization**

466 **ability and their effects on nematode fitness.** Presence of metabolic traits (light

467 purple color), which were found to be associated with the bacteria's ability to colonize *C.*

468 *elegans* or affect nematode population growth as a proxy for worm fitness (green color).

469 Regression models suggested that the pathway of pyruvate fermentation to acetoin

470 influences bacterial load while the presence of hydroxyproline degradation is associated

471 with *C. elegans* population growth. Colonization and population growth data was

472 normalized; darker colors indicate increased capacities. Different bacterial genera are

473 indicated by the different colors of the strain names (Table 1).

474

475

476 To further explore the potential behavior of the microbiome isolates in an ecological

477 context, we interpreted their genomic and metabolic traits in light of the universal

478 adaptive strategy theory (52,53). We found that 26 isolates were associated with a

479 competitive, 9 with a stress-tolerating, and 37 with a ruderal (fast niche occupiers)

480 strategy (Fig. 5a). The remaining 6 isolates showed a mixed strategy (same score for

481 competition and stress-tolerance). Interestingly, bacterial isolates with different adaptive

482 strategies also varied in their colonization ability (Fig. 5b): Bacterial isolates with

483 competitive or stress-tolerance strategies showed higher bacterial load in *C. elegans*

484 than those with ruderal strategy (Wilcoxon rank sum test,  $P = 0.01$ ). Moreover, for the  
485 competitive and stress-tolerance isolates, we identified a positive correlation between  
486 bacterial load and the inferred score (Spearman,  $R_s = 0.37$ ,  $P = 0.1$ ; Supplementary Fig.  
487 S8). Taken together, the competitive and stress-tolerating strategies are most prevalent  
488 within the microbiome of *C. elegans* and relate to bacterial colonization capacity.

489

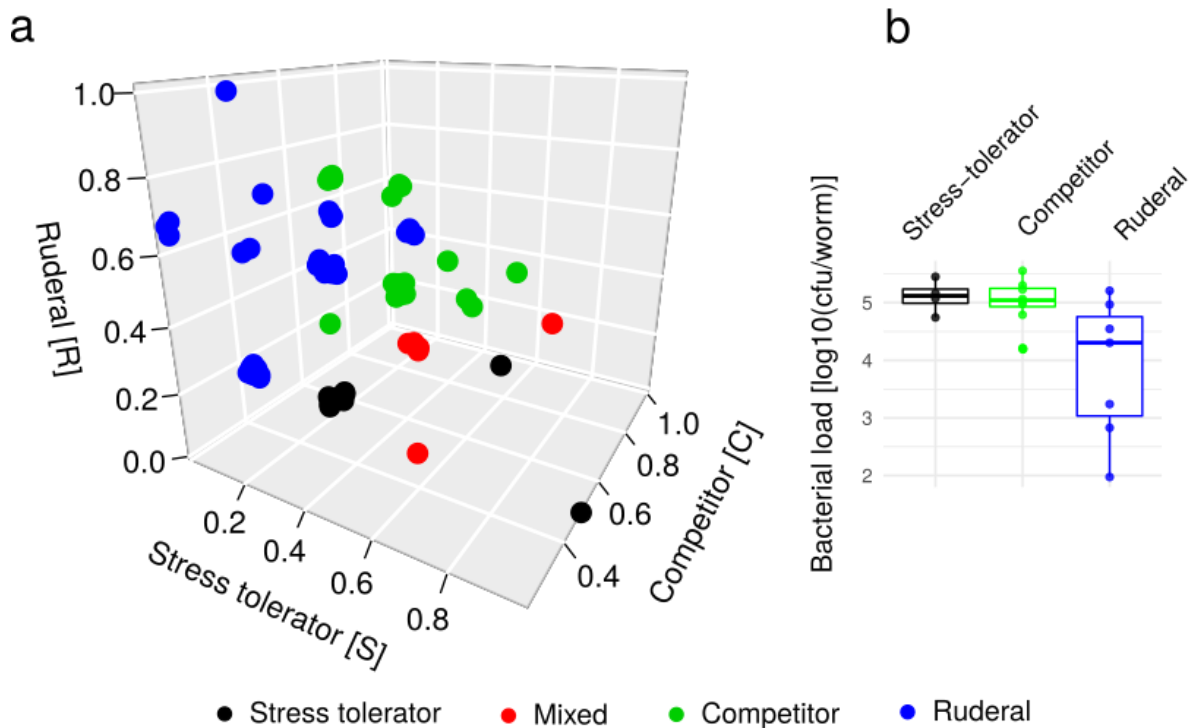

490 ● Stress tolerator ● Mixed ● Competitor ● Ruderal

491 **Fig. 5. Different adaptive strategies within the microbiome and their relationship to**  
492 **worm colonization.** We applied the universal adaptive strategy theory proposed for soil  
493 bacteria (48) to categorize the bacterial isolates. (a) Based on genomic and metabolic  
494 features, each isolate obtained a score for the competitive (C), stress tolerating (S), and  
495 ruderal (R) strategy, which is represented in the 3D-coordinate system. (b) Bacterial  
496 colonization behavior in comparison to adaptive strategies. Isolates which were  
497 categorized as mixed strategists (i.e. same score for competitive and stress-tolerance)

498 produced the lowest bacterial load, whereas stress-tolerator and competitors had the  
499 highest values. The difference in bacterial load between ruderal and other strategies  
500 was significant (Wilcoxon rank sum test,  $P = 0.01$ ).

## 501 **Discussion**

502 We here present the first overview of the functional repertoire encoded within the native  
503 microbiome of the model organism *C. elegans* and provide a metabolic framework for  
504 the functional analysis of host-associated microbial communities, which combines  
505 genome sequence data, metabolic network modeling, and physiological  
506 characterizations. For our analysis, we obtained whole genome sequences and  
507 reconstructed the metabolic network of 77 microbiome members. We identified variation  
508 in the metabolic competences within the microbiome and found that the community as a  
509 whole is able to produce nutrients essential for *C. elegans* growth. For selected bacteria,  
510 we were able to validate the model predictions with the help of physiological analyses.  
511 Moreover, we used both *in vitro* and *in silico* approaches to demonstrate that the nutrient  
512 environment can lead to a shift in the interaction between bacteria, for example from  
513 competition to mutualism. We further identified specific metabolic modules that appear  
514 to shape the interaction with the nematode host, including pyruvate fermentation to (S)-  
515 acetoin and the degradation of trans-3-hydroxyproline. Finally, we considered a  
516 combination of genomic, metabolic and cellular traits to infer bacterial life history  
517 strategies according to the universal adaptive strategy theory (52,53), finding that  
518 bacterial colonization ability is associated with a competitive or stress-tolerant strategy.  
519 In the following, we will discuss in more detail (i) the diversity of metabolic competences  
520 in the microbiome and possible implications for *C. elegans* biology, (ii) how the  
521 metabolic networks shape bacteria-bacteria interactions, and (iii) in which ways bacterial  
522 traits can affect colonization and *C. elegans* fitness.

523 Our analysis revealed that the microbiome members are jointly able to synthesize all  
524 essential nutrients required by *C. elegans*. Individual bacterial isolates are not able to do  
525 so. The considered isolates varied in their capacity to produce vitamins essential to *C.*  
526 *elegans*, such as folate, thiamine, and vitamin B12, which are known to affect nematode  
527 physiology and life history (20,21,23,57–59). For example, vitamin B12 influences  
528 propionate breakdown, it can accelerate development, and reduce fertility (58,59).  
529 Within the microbiome isolates studied here, only *Pseudomonas* and *Ochrobactrum*  
530 strains had the pathways to produce vitamin B12. An enrichment of these genera in the  
531 microbiome should therefore affect both the metabolic state and fitness of *C. elegans*.

532 Our study demonstrated that bacterial interactions can change depending on the  
533 nutrient environment. In our simulations, competitive interactions dominated in rich  
534 medium (TSB), while parasitic and mutualistic interactions in minimal medium.  
535 Furthermore, interactions between *Pseudomonas lurida* (MYb11) and *Ochrobactrum* sp.  
536 (MYb71) shifted from parasitic to competitive in a sucrose- vs. glucose-supplemented  
537 medium. In line with this, we have detected a secreted sucrose invertase in the genome  
538 of MYb71, which otherwise lacks any known sucrose transporter. Thus, we propose that  
539 MYb71 breaks down sucrose extracellularly, and the monosaccharides glucose and  
540 fructose become exploitable by MYb11. While a similar phenomenon has been  
541 described in cultures of yeast with engineered auxotrophies (60,61), we here observed  
542 this capacity in strains from a natural community of host-associated microbes. This  
543 emphasizes the relevance of nutrient context in host-microbiome interactions.  
544 Importantly, no single growth medium might reliably predict all possible interaction types  
545 among bacteria. It is therefore essential to consider the nutrient context in order to fully  
546 understand the range of possible interactions within the microbiome (e.g. (62)).

547 Our analysis further identified two bacterial traits that appear to influence colonization  
548 ability and impact *C. elegans* fitness. Colonization ability was associated with pyruvate  
549 fermentation to (S)-acetoin. This fermentation pathway includes the ketone diacetyl as  
550 an intermediate, whose buttery odor attracts *C. elegans* and promotes feeding behaviour  
551 (63). In detail, diacetyl binds the transmembrane odor receptor *odr-10* and induces a  
552 shift in odortaxis (63–65). As a result, worms are more attracted to and less likely to  
553 leave bacterial lawns with this particular smell (63). Indeed, lactic acid bacteria in rotting  
554 citrus fruits were more attractive to worms when releasing diacetyl (66). Similarly,  
555 entomopathogenic nematodes of the genus *Steinernema* were more attracted to insect  
556 cadavers, when they were infected with the diacetyl-producing bacterial symbionts of the  
557 nematode (67). Thus, if worms are attracted to diacetyl-producing bacteria, they should  
558 spend more time in their presence. This alone could increase uptake of bacteria and  
559 subsequently bacterial colonization.

560 We also found that trans-3-hydroxyproline degradation in bacteria is associated with  
561 increased nematode fitness. In worms, hydroxyproline is present in collagen type IV, a  
562 major component of the extracellular matrix in the pharynx, intestine and cuticle (68–70).  
563 The breakdown of hydroxyproline can generate reactive oxygen species (71). These  
564 may act as signaling molecules, which could affect cellular proliferation (72) and *C.*  
565 *elegans* reproduction (73). Whether ROS in the gut increases brood size is unknown.  
566 Alternatively, bacteria with the degradation pathway may utilize the amino acid as a  
567 carbon source, consistent with the “microbiome on the leash” hypothesis, characterized  
568 by host-selection of bacterial traits (74) and where nematodes indirectly benefit, if  
569 damage is limited and if it allows worms to maintain a beneficial symbiont.

570 Our analysis of bacterial life history strategies (52,53) additionally identified  
571 competitiveness and stress tolerance to associate with *C. elegans* colonization. It  
572 appears that the ability to outcompete other microbes and/or tolerate stress  
573 environments is an important requirement for a close relationship with the nematode. By  
574 linking bacterial genomics, metabolism, and physiology with worm phenotypes, we were  
575 thus able to generate testable hypotheses on traits and adaptive strategies important for  
576 life in the worm.

577 In conclusion, our study provides a resource of naturally associated bacteria, their whole  
578 genome sequences, and reconstructed metabolic competences that can be exploited to  
579 study and understand *C. elegans* in an ecologically meaningful context. This resource  
580 may help to further establish *C. elegans* as a versatile model for studying the genetics of  
581 host-microbe interactions. It may also prove useful to characterize a variety of  
582 phenotypes and underlying molecular mechanisms in *C. elegans*, which have thus far  
583 only been studied in the complete absence of the worm's microbiome.

584

## 585 **Acknowledgements**

586 We thank Simone Severitt and Nicole Heyer for technical assistance regarding PacBio  
587 genome sequencing, Jolantha Swiderski for long read genome assemblies, Peter  
588 Deines for advice on BIOLOG assays, and the BiMo/LMB of Kiel University for access to  
589 their core facilities. We are grateful for funding from the Deutsche  
590 Forschungsgemeinschaft (DFG, German Research Foundation) within the Collaborative  
591 Research Center CRC 1182 on Origin and Function of Metaorganisms, projects A1 (HS,  
592 KD, ML), A4 (HS), and INF (MPH, CK). We further acknowledge funding by the DFG

593 under Germany's Excellence Strategy – EXC 2167-390884018 (Excellence Cluster  
594 Precision Medicine in Chronic Inflammation; CK, HS), the Competence Center for  
595 Genome Analysis Kiel (CCGA Kiel; HS), the Max-Planck Society (Fellowship to HS), and  
596 the International Max-Planck Research School for Evolutionary Biology (NO).

597

598 **Conflict of Interest**

599 The authors declare no conflict of interest.

600

601 Supplementary information is available at ISME's website.



602 **References**

- 603 1. McFall-Ngai M, Hadfield MG, Bosch TCG, Carey HV, Domazet-Lošo T, Douglas AE,  
604 et al. Animals in a bacterial world, a new imperative for the life sciences. *Proc Natl Acad*  
605 *Sci United States Am.* 2013; **110**(9):3229–36.
- 606 2. Bosch TCG, Miller DJ. *The Holobiont Imperative*. Springer Vienna; 2016 [cited  
607 2016]. Available from: <http://link.springer.com/10.1007/978-3-7091-1896-2>
- 608 3. Pascoe EL, Hauffe HC, Marchesi JR, Perkins SE. Network analysis of gut  
609 microbiota literature: an overview of the research landscape in non-human animal  
610 studies. *ISME J.* 2017;**11**(12):2644–51.
- 611 4. Wong CNA, Ng P, Douglas AE. Low-diversity bacterial community in the gut of  
612 the fruitfly *Drosophila melanogaster*. *Environ Microbiol.* 2011;**13**(7):1889–900.
- 613 5. Consortium THMP. Structure, function and diversity of the healthy human  
614 microbiome. *Nature.* 2012; 486:207–14.
- 615 6. Moran NA, Hansen AK, Powell JE, Sabree ZL. Distinctive gut microbiota of honey  
616 bees assessed using deep sampling from individual worker bees. *PloS one.*  
617 2012;**7**(4):e36393.
- 618 7. Louca S, Parfrey LW, Doebeli M. Decoupling function and taxonomy in the global  
619 ocean microbiome. *Science.* 2016;**353**(6305):1272–7.
- 620 8. Kwong WK, Engel P, Koch H, Moran NA. Genomics and host specialization of  
621 honey bee and bumble bee gut symbionts. *Proc Natl Acad Sci United States Am.*  
622 2014;**111**(31):11509–14.

- 623 9. Bordbar A, Monk JM, King ZA, Palsson BO. Constraint-based models predict  
624 metabolic and associated cellular functions. *Nat Rev Genet.* 2014;**15**:107–20.
- 625 10. Luan J-B, Chen W, Hasegawa DK, Simmons AM, Wintermantel WM, Ling K-S, et  
626 al. Metabolic Coevolution in the Bacterial Symbiosis of Whiteflies and Related Plant  
627 Sap-Feeding Insects. *Genome Biol Evol.* 2015;**7**(9):2635–47.
- 628 11. Ankrah NYD, Luan J, Douglas AE. Cooperative Metabolism in a Three-Partner  
629 Insect-Bacterial Symbiosis Revealed by Metabolic Modeling. *J Bacteriol.* 2017;**199**(15).
- 630 12. Magnúsdóttir S, Heinken A, Kutt L, Ravcheev DA, Bauer E, Noronha A, et al.  
631 Generation of genome-scale metabolic reconstructions for 773 members of the human  
632 gut microbiota. *Nat Biotechnol.* 2017;**35**(1):81–9.
- 633 13. Bauer E, Laczny CC, Magnúsdóttir S, Wilmes P, Thiele I. Phenotypic  
634 differentiation of gastrointestinal microbes is reflected in their encoded metabolic  
635 repertoires. *Microbiome.* 2015;**3**:55.
- 636 14. Berg M, Stenuit B, Ho J, Wang A, Parke C, Knight M, et al. Assembly of the  
637 *Caenorhabditis elegans* gut microbiota from diverse soil microbial environments. *ISME J*  
638 2016;**10**(8):1998–2009.
- 639 15. Dirksen P, Marsh SA, Braker I, Heitland N, Wagner S, Nakad R, et al. The native  
640 microbiome of the nematode *Caenorhabditis elegans*: gateway to a new host-  
641 microbiome model. *BMC Biol.* 2016; 14:38.
- 642 16. Samuel BS, Rowedder H, Braendle C, Félix M-A, Ruvkun G. *Caenorhabditis*  
643 *elegans* responses to bacteria from its natural habitats. *Proc Natl Acad Sci United States*  
644 *Am.* 2016;**113**(27):E3941–9.

- 645 17. Zhang F, Berg M, Dierking K, Félix M-A, Shapira M, Samuel BS, et al. as a Model  
646 for Microbiome Research. *Front Microbiol.* 2017; 8:485.
- 647 18. MacNeil LT, Watson E, Arda HE, Zhu LJ, Walhout AJM. Diet-induced  
648 developmental acceleration independent of TOR and insulin in *C. elegans*. *Cell.*  
649 2013;**153**(1):240–52.
- 650 19. Watson E, MacNeil LT, Ritter AD, Yilmaz LS, Rosebrock AP, Caudy AA, et al.  
651 Interspecies Systems Biology Uncovers Metabolites Affecting *C. elegans* Gene  
652 Expression and Life History Traits. *Cell.* 2014;**156**(6):1336–7.
- 653 20. Chaudhari SN, Mukherjee M, Vagasi AS, Bi G, Rahman MM, Nguyen CQ, et al.  
654 Bacterial Folates Provide an Exogenous Signal for *C. elegans* Germline Stem Cell  
655 Proliferation. *Dev cell.* 2016;**38**(1):33–46.
- 656 21. Virk B, Jia J, Maynard CA, Raimundo A, Lefebvre J, Richards SA, et al. Folate  
657 Acts in *E. coli* to Accelerate *C. elegans* Aging Independently of Bacterial Biosynthesis.  
658 *Cell reports.* 2016;**14**(7):1611–20.
- 659 22. Shapira M. Host-microbiota interactions in *Caenorhabditis elegans* and their  
660 significance. *Curr Opin Microbiol.* 2017;**38**:142–7.
- 661 23. Cabreiro F, Au C, Leung K-Y, Vergara-Irigaray N, Cochemé HM, Noori T, et al.  
662 Metformin retards aging in *C. elegans* by altering microbial folate and methionine  
663 metabolism. *Cell.* 2013;**153**(1):228–39.
- 664 24. Scott TA, Quintaneiro LM, Norvaisas P, Lui PP, Wilson MP, Leung K-Y, et al.  
665 Host-Microbe Co-metabolism Dictates Cancer Drug Efficacy in *C. elegans*. *Cell.*  
666 2017;**169**(3):442–456.e18.

- 667 25. García-González AP, Ritter AD, Shrestha S, Andersen EC, Yilmaz LS, Walhout  
668 AJM. Bacterial Metabolism Affects the *C. elegans* Response to Cancer  
669 Chemotherapeutics. *Cell*. 2017;**169**(3):431–441.e8.
- 670 26. Norvaisas P, Cabreiro F. Pharmacology in the age of the holobiont. *Curr Opin*  
671 *Syst Biol* [Internet]. 10.
- 672 27. Stiernagle T. Maintenance of *C. elegans*. *Wormb: Online Rev C elegans Biol*.  
673 2006;1–11. Available from: <http://www.ncbi.nlm.nih.gov/pubmed/18050451>
- 674 28. von der Schulenburg JH, Hancock JM, Pagnamenta A, Sloggett JJ, Majerus ME,  
675 Hurst GD. Extreme length and length variation in the first ribosomal internal transcribed  
676 spacer of ladybird beetles (Coleoptera: Coccinellidae). *Mol Biol Evol*. **18**(4):648–60.
- 677 29. Li H, Durbin R. Fast and accurate short read alignment with Burrows-Wheeler  
678 transform. *Bioinformatics*. 2009. **25**:1754–60.
- 679 30. Koboldt DC, Zhang Q, Larson DE, Shen D, McLellan MD, Lin L, et al. VarScan 2:  
680 somatic mutation and copy number alteration discovery in cancer by exome sequencing.  
681 *Genome Res*. 2012;**22**(3):568–76.
- 682 31. Bolger AM, M Lohse BU. Trimmomatic: a flexible trimmer for Illumina sequence  
683 data. *Bioinformatics*. 2014;**30**(15):2114-20.
- 684 32. Bankevich A, Nurk S, Antipov D, Gurevich AA, Dvorkin M, Kulikov AS, et al.  
685 SPAdes: a new genome assembly algorithm and its applications to single-cell  
686 sequencing. *J Comput Biol*. 2012;**19**(5):455–77.
- 687 33. Seemann T. Prokka: rapid prokaryotic genome annotation. *Bioinformatics*.  
688 2014;**30**(14):2068–9.

- 689 34. Alikhan N-F, Petty NK, Ben Zakour NL, Beatson SA. BLAST Ring Image  
690 Generator (BRIG): simple prokaryote genome comparisons. *BMC Genomic.*  
691 2011;**12**:402.
- 692 35. Henry CS, DeJongh M, Best AA, Frybarger PM, Lindsay B, Stevens RL. High-  
693 throughput generation, optimization and analysis of genome-scale metabolic models.  
694 *Nat Biotechnol.* 2010;**28**(9):977–82.
- 695 36. Caspi R, Billington R, Fulcher CA, Keseler IM, Kothari A, Krummenacker M, et al.  
696 The MetaCyc database of metabolic pathways and enzymes. *Nucleic acids Res.*  
697 2018;**46**(D1):D633–9.
- 698 37. Activities at the Universal Protein Resource (UniProt). *Nucleic Acids Res.*  
699 2014;**42**:D191–D198–D191–D198.
- 700 38. Chen L, Zheng D, Liu B, Yang J, Jin Q. VFDB 2016: hierarchical and refined  
701 dataset for big data analysis--10 years on. *Nucleic acids Res.* 2016;**44**(D1):D694–7.
- 702 39. Tange O. GNU Parallel - The Command-Line Power Tool. ;login: *USENIX Mag.*  
703 2011;**36**(1):42–7.
- 704 40. Pagès H, Aboyou P, Gentleman R, DebRoy S. Biostrings: Efficient manipulation  
705 of biological strings. R package version 2.50.1; 2018.
- 706 41. Quast C, Pruesse E, Yilmaz P, Gerken J, Schweer T, Yarza P, et al. The SILVA  
707 ribosomal RNA gene database project: improved data processing and web-based tools.  
708 *Nucleic acids Res.* 2013;**41**(Database issue):D590–6.

- 709 42. Lagesen K, Hallin P, Rødland EA, Staerfeldt HH, Rognes T, Ussery DW.  
710 RNAmmer: consistent and rapid annotation of ribosomal RNA genes. *Nucleic acids Res.*  
711 2007;**35**(9):3100–8.
- 712 43. Suzuki R, Shimodaira H. Pvcust: an R package for assessing the uncertainty in  
713 hierarchical clustering. *Bioinformatics.* **22**:1540–2.
- 714 44. Hartigan JA, Wong MA. Algorithm AS 136: A K-Means Clustering Algorithm. *Appl*  
715 *Stat.* 1979; **28**(1); 100-108.
- 716 45. R Foundation For Statistical Computing Austria V. R Development Core Team, R:  
717 a language and environment for statistical computing. 2011;2.4.0 edit:3.
- 718 46. Wickham H. ggplot: Elegant Graphics for Data Analysis [Internet]. Use R.  
719 Springer; 2009.
- 720 47. Petersen TN, Brunak S, von Heijne G, Nielsen H. SignalP 4.0: discriminating  
721 signal peptides from transmembrane regions. *Nat methods.* 2011;**8**(10):785–6.
- 722 48. Bauer E, Zimmermann J, Baldini F, Thiele I, Kaleta C. BacArena: Individual-  
723 based metabolic modeling of heterogeneous microbes in complex communities. *PLoS*  
724 *Comput Biol.* 2017; **13**(5):e1005544.
- 725 49. Gelius-Dietrich G, Desouki AA, Fritzemeier CJ, Lercher MJ. Sybil--efficient  
726 constraint-based modelling in R. *BMC Syst Biol.* 2013; **7**:125.
- 727 50. Heinken A, Sahoo S, Fleming RMT, Thiele I. Systems-level characterization of a  
728 host-microbe metabolic symbiosis in the mammalian gut. *Gut Microbes.* 2013;**4**(1):28–  
729 40.

- 730 51. Genuer R, Poggi J-M, Tuleau-Malot C. VSURF: an R package for variable  
731 selection using random forests. 7th ed. 2015. p. 19–33.
- 732 52. Grime JP. Evidence for the Existence of Three Primary Strategies in Plants and  
733 Its Relevance to Ecological and Evolutionary Theory. 1977. *Am Nat.*  
734 **111**(982):1169:1194.
- 735 53. Fierer N. Embracing the unknown: disentangling the complexities of the soil  
736 microbiome. *Nat Rev Microbiol.* 2017;**15**(10):579–90.
- 737 54. Chain PSG, Lang DM, Comerci DJ, Malfatti SA, Vergez LM, Shin M, et al.  
738 Genome of *Ochrobactrum anthropi* ATCC 49188 T, a versatile opportunistic pathogen  
739 and symbiont of several eukaryotic hosts. *J Bacteriol.* 2011;**193**(16):4274–5.
- 740 55. Kissoyan KA, Drechsler M, Stange E, Zimmermann J, Kaleta C, Bode H, et al.  
741 Natural *C. elegans* microbiota protects against infection via production of a cyclic  
742 lipopeptide of the viscosin group. *Curr Biol.* (in press).
- 743 56. Sieber M, Pita L, Weilan-Bräuer N, Dirksen P, Wang J, Mortzfeld B, et al. The  
744 Neutral Metaorganism. bioRxiv. 2018. p. 367243.
- 745 57. Bito T, Matsunaga Y, Yabuta Y, Kawano T, Watanabe F. Vitamin B12 deficiency  
746 in *Caenorhabditis elegans* results in loss of fertility, extended life cycle, and reduced  
747 lifespan. *FEBS open bio.* 2013 ;**3**:112–7.
- 748 58. Watson E, MacNeil LT, Ritter AD, Yilmaz LS, Rosebrock AP, Caudy AA, et al.  
749 Interspecies systems biology uncovers metabolites affecting *C. elegans* gene  
750 expression and life history traits. *Cell.* 2014;**156**(4):759–70.

- 751 59. Watson E, Olin-Sandoval V, Hoy MJ, Li C-H, Lousse T, Yao V, et al. Metabolic  
752 network rewiring of propionate flux compensates vitamin B12 deficiency in *C. elegans*.  
753 *eLife*. 2016;5.
- 754 60. Hoek TA, Axelrod K, Biancalani T, Yurtsev EA, Liu J, Gore J. Resource  
755 Availability Modulates the Cooperative and Competitive Nature of a Microbial Cross-  
756 Feeding Mutualism. *PLoS Biol*. 2016 **14**(8):e1002540.
- 757 61. Zomorodi AR, Segrè D. Genome-driven evolutionary game theory helps  
758 understand the rise of metabolic interdependencies in microbial communities. *Nat*  
759 *Commun*. 2017;**8**(1):1563.
- 760 62. Coyte KZ, Schluter J, Foster KR. The ecology of the microbiome: Networks,  
761 competition, and stability. *Science*. 2015;**350**(6261):663–6.
- 762 63. Ryan DA, Miller RM, Lee K, Neal SJ, Fagan KA, Sengupta P, et al. Sex, age, and  
763 hunger regulate behavioral prioritization through dynamic modulation of chemoreceptor  
764 expression. *Curr Biol*. 2014;**24**(21):2509–17.
- 765 64. Zhang Y, Chou JH, Bradley J, Bargmann CI, Zinn K. The *Caenorhabditis elegans*  
766 seven-transmembrane protein ODR-10 functions as an odorant receptor in mammalian  
767 cells. *Proc Natl Acad Sci United States Am*. 1997;**94**(22):12162–7.
- 768 65. Sengupta P, Chou JH, Bargmann CI. odr-10 encodes a seven transmembrane  
769 domain olfactory receptor required for responses to the odorant diacetyl. *Cell*.  
770 1996;**84**(6):899–909.



- 771 66. Choi JI, Yoon K-H, Subbammal Kalichamy S, Yoon S-S, Il Lee J. A natural odor  
772 attraction between lactic acid bacteria and the nematode *Caenorhabditis elegans*. *ISME*  
773 *J.* 2016;**10**(3):558–67.
- 774 67. Baiocchi T, Lee G, Choe D-H, Dillman AR. Host seeking parasitic nematodes use  
775 specific odors to assess host resources. *Sci reports.*;7(1):6270.
- 776 68. Page AP, Johnstone IL. The cuticle. *Wormb: Online Rev C elegans Biol.* 2007;1–  
777 15. Available from: <http://www.ncbi.nlm.nih.gov/pubmed/18050497>
- 778 69. Hutter H, Vogel BE, Plenefisch JD, Norris CR, Proenca RB, Spieth J, et al.  
779 Conservation and novelty in the evolution of cell adhesion and extracellular matrix  
780 genes. *Science.* 2000;**287**(5455):989–94.
- 781 70. Graham PL, Johnson JJ, Wang S, Sibley MH, Gupta MC, Kramer JM. Type IV  
782 collagen is detectable in most, but not all, basement membranes of *Caenorhabditis*  
783 *elegans* and assembles on tissues that do not express it. *J cell Biol.* 1997;**137**(5):1171–  
784 83.
- 785 71. Cooper SK, Pandhare J, Donald SP, Phang JM. A novel function for  
786 hydroxyproline oxidase in apoptosis through generation of reactive oxygen species. *J*  
787 *Biol Chem.* 2008; **283**(16):10485–92.
- 788 72. Halliwell B. Biochemistry of oxidative stress. *Biochem Soc Trans.* 2007;**35**(Pt  
789 5):1147–50.
- 790 73. De Henau S, Tilleman L, Vangheel M, Luyckx E, Trashin S, Pauwels M, et al. A  
791 redox signalling globin is essential for reproduction in *Caenorhabditis elegans*. *Nat*  
792 *Commun.* 2015;**6**:8782.

- 793 74. Foster KR, Schluter J, Coyte KZ, Rakoff-Nahoum S. The evolution of the host  
794 microbiome as an ecosystem on a leash. *Nature* .2017;**548**(7665):43–51.
